# Supplementary material
Source: PubMed Central journal article supplement (PMC3645444)
Supplement: NIHMS457084-supplement-supplement.pdf [file NIHMS457084-supplement-supplement.pdf]

## Supplementary Online Content

Levin GP, Robinson-Cohen C, de Boer IH, Houston DK, Lohman K, Liu Y, et al. Genetic variants and associations of 25-hydroxyvitamin D concentrations with major clinical outcomes. *JAMA*. 2012;308(18):doi:10.1001/jama.2012.17304.

**eTable 1.** Detailed methods for measurement of 25(OH)D concentrations and genotyping in the Cardiovascular Health Study, Health ABC, InCHIANTI, and ULSAM cohorts

**eTable 2.** Incident events in the Cardiovascular Health Study, Health ABC, InCHIANTI, and ULSAM cohorts

**eTable 3.** Detailed results in the Cardiovascular Health Study, Health ABC, InCHIANTI, and ULSAM cohorts for interactions between low vitamin D and *VDR* SNPs rs7968585 and rs2239179 on risk of the composite outcome

**eFigure 1.** Flow chart defining the Cardiovascular Health Study discovery cohort

**eFigure 2.** Penalized spline describing the association between season-specific 25-hydroxyvitamin D Z score and risk of the composite outcome, adjusted for age and sex, in the Cardiovascular Health Study

**eFigure 3.** Estimates of interaction between low vitamin D and the number of minor alleles on risk of the composite outcome, by study and overall, for the two *VDR* variants: rs7968585 and rs2239179

**eFigure 4.** Kaplan-Meier plots describing the association of low vitamin D with risk of the composite outcome in the Cardiovascular Health Study, stratified according to the number of copies of the minor allele for the 2 *VDR* variants: rs7968585 and rs2239179

### eReferences

This supplementary material has been provided by the authors to give readers additional information about their work.

**eTable 1.** Detailed methods for measurement of 25(OH)D concentrations and genotyping in the Cardiovascular Health Study<sup>1</sup>, Health ABC<sup>2</sup>, InCHIANTI<sup>3</sup>, and ULSAM<sup>4</sup> cohorts

|                          | CHS                                      | Health ABC                      | InCHIANTI                       | ULSAM                                             |
|--------------------------|------------------------------------------|---------------------------------|---------------------------------|---------------------------------------------------|
| 25(OH)D Concentration    |                                          |                                 |                                 |                                                   |
| Measurement              | Mass spectrometry (Waters Quattro Micro) | Radioimmunoassay (DiaSorin RIA) | Radioimmunoassay (DiaSorin RIA) | Liquid chromatography-mass spectrometry (HP 1100) |
| Coefficient of Variation | < 3.4%                                   | < 6.8%                          | < 10.2%                         | < 7.6%                                            |
| Genotyping               |                                          |                                 |                                 |                                                   |
| Array type(s)            | Illumina 370 CNV BeadChip                | Illumina Human1M-Duo BeadChip   | Illumina 550K                   | Illumina Golden Gate, Illumina Infinum II         |
| Genotype Calling         | Illumina BeadStudio                      | Illumina BeadStudio             | Illumina BeadStudio             | Illumina GenomeStudio                             |

**eTable 2.** Incident events in the Cardiovascular Health Study, Health ABC, InCHIANTI, and ULSAM cohorts

|                                                                                                                        | CHS<br>(N = 1,514)                        | Health ABC<br>(N = 922)                  | InCHIANTI<br>(N = 835)                   | ULSAM<br>(N = 970)                       |
|------------------------------------------------------------------------------------------------------------------------|-------------------------------------------|------------------------------------------|------------------------------------------|------------------------------------------|
| Median (maximum) follow-up, in years                                                                                   | 11 (15)                                   | 7 (8)                                    | 6 (8)                                    | 13 (19)                                  |
| Numbers of events                                                                                                      |                                           |                                          |                                          |                                          |
| Composite outcome                                                                                                      | 948                                       | 317                                      | 184                                      | 715                                      |
| Hip fracture                                                                                                           | 129                                       | 28                                       | 15                                       | 63                                       |
| Myocardial infarction                                                                                                  | 179                                       | 45                                       | 58                                       | 132                                      |
| Cancer                                                                                                                 | 304                                       | 137                                      | 12                                       | 258                                      |
| Death                                                                                                                  | 336                                       | 107                                      | 99                                       | 262                                      |
| Person-years of follow-up                                                                                              | 11,424                                    | 5,554                                    | 8,128                                    | 10,612                                   |
| Incidence rates <sup>a</sup> of composite outcome (95% CI)                                                             |                                           |                                          |                                          |                                          |
| Overall                                                                                                                | 6.8 (6.3, 7.2)                            | 5.7 (5.1, 6.4)                           | 3.9 (3.5, 4.3)                           | 6.7 (6.3, 7.2)                           |
| Normal 25(OH)D                                                                                                         | 6.4 (6.0, 6.9)                            | 5.5 (4.8, 6.2)                           | 3.2 (2.9, 3.8)                           | 6.7 (6.2, 7.2)                           |
| Low 25(OH)D                                                                                                            | 8.2 (7.2, 9.3)                            | 6.6 (5.2, 8.3)                           | 6.2 (5.1, 7.5)                           | 7.0 (5.9, 8.2)                           |
| Difference <sup>b</sup>                                                                                                | 1.8 (0.6, 2.9)                            | 1.1 (-0.6, 2.8)                          | 2.9 (1.6, 4.2)                           | 0.3 (-1.0, 1.5)                          |
| Association <sup>c</sup> of low 25(OH)D <sup>d</sup> with risk of the composite outcome (HR (95% CI); <i>p</i> -value) | 1.32<br>(1.13, 1.54);<br><i>p</i> = 0.001 | 1.33<br>(1.02, 1.73);<br><i>p</i> = 0.04 | 1.20<br>(0.85, 1.70);<br><i>p</i> = 0.30 | 1.05<br>(0.88, 1.26);<br><i>p</i> = 0.60 |

Abbreviations: HR = hazard ratio, CI = confidence interval

<sup>a</sup> Unadjusted rates are reported as the number of events per 100 person-years, with Poisson-based confidence intervals

<sup>b</sup> Difference computed as incidence rate in participants with low 25(OH)D minus rate in those with normal 25(OH)D concentrations

<sup>c</sup> Adjusted for age and sex

<sup>d</sup> Normal/Low 25(OH)D defined by above/below the season-specific 20th percentile of 25(OH)D concentrations

**eTable 3.** Detailed results in the Cardiovascular Health Study, Health ABC, InCHIANTI, and ULSAM cohorts for interactions between low vitamin D and VDR SNPs rs7968585 and rs2239179 on risk of the composite outcome

| SNP       | Endpoint              | CHS                       | Health ABC        | InCHIANTI          | ULSAM             | Meta-analysis     |
|-----------|-----------------------|---------------------------|-------------------|--------------------|-------------------|-------------------|
|           |                       | HRR <sup>a</sup> (95% CI) | HRR (95% CI)      | HRR (95% CI)       | HRR (95% CI)      | HRR (95% CI)      |
| rs7968585 | Hip fracture          | 1.25 (0.80, 1.95)         | 1.50 (0.96, 2.33) | 1.49 (0.24, 9.35)  | 0.73 (0.34, 1.53) | 1.25 (0.94, 1.66) |
|           | Myocardial Infarction | 1.25 (0.81, 1.92)         | 1.27 (0.92, 1.81) | 3.55 (0.74, 17.04) | 1.31 (0.72, 2.37) | 1.30 (1.02, 1.66) |
|           | Cancer                | 1.51 (1.06, 2.16)         | 1.03 (0.80, 1.32) | 2.09 (0.70, 6.21)  | 1.15 (0.77, 1.72) | 1.18 (0.99, 1.42) |
|           | Death                 | 1.31 (1.04, 1.64)         | 1.06 (0.87, 1.29) | 1.32 (0.70, 2.50)  | 1.02 (0.78, 1.32) | 1.13 (1.00, 1.28) |
|           | Composite             | 1.40 (1.13, 1.73)         | 1.14 (0.97, 1.34) | 1.59 (1.01, 2.51)  | 1.12 (0.88, 1.42) | 1.22 (1.09, 1.36) |
| rs2239179 | Hip fracture          | 0.92 (0.59, 1.46)         | 0.68 (0.44, 1.04) | 2.60 (0.45, 15.12) | NA                | 0.82 (0.60, 1.11) |
|           | Myocardial Infarction | 0.73 (0.47, 1.15)         | 0.90 (0.62, 1.29) | 0.77 (0.14, 4.04)  | NA                | 0.83 (0.62, 1.09) |
|           | Cancer                | 0.61 (0.43, 0.87)         | 0.90 (0.71, 1.15) | 0.54 (0.15, 1.85)  | NA                | 0.79 (0.65, 0.96) |
|           | Death                 | 0.83 (0.66, 1.04)         | 1.09 (0.90, 1.33) | 0.56 (0.29, 1.05)  | NA                | 0.95 (0.82, 1.09) |
|           | Composite             | 0.74 (0.60, 0.92)         | 0.95 (0.81, 1.10) | 0.66 (0.41, 1.05)  | NA                | 0.85 (0.76, 0.97) |

Abbreviations: CI = confidence interval, HRR = hazard ratio ratio (adjusted for age and sex), SNP = single nucleotide polymorphism

<sup>a</sup> The hazard ratio ratio (HRR) is the ratio, for each additional minor allele, of the hazard ratio describing the association between low 25-hydroxyvitamin D and disease risk. Normal/Low 25(OH)D defined by above/below the season-specific 20th percentile of 25(OH)D concentrations.

**eFigure 1. Flow chart defining the Cardiovascular Health Study discovery cohort**

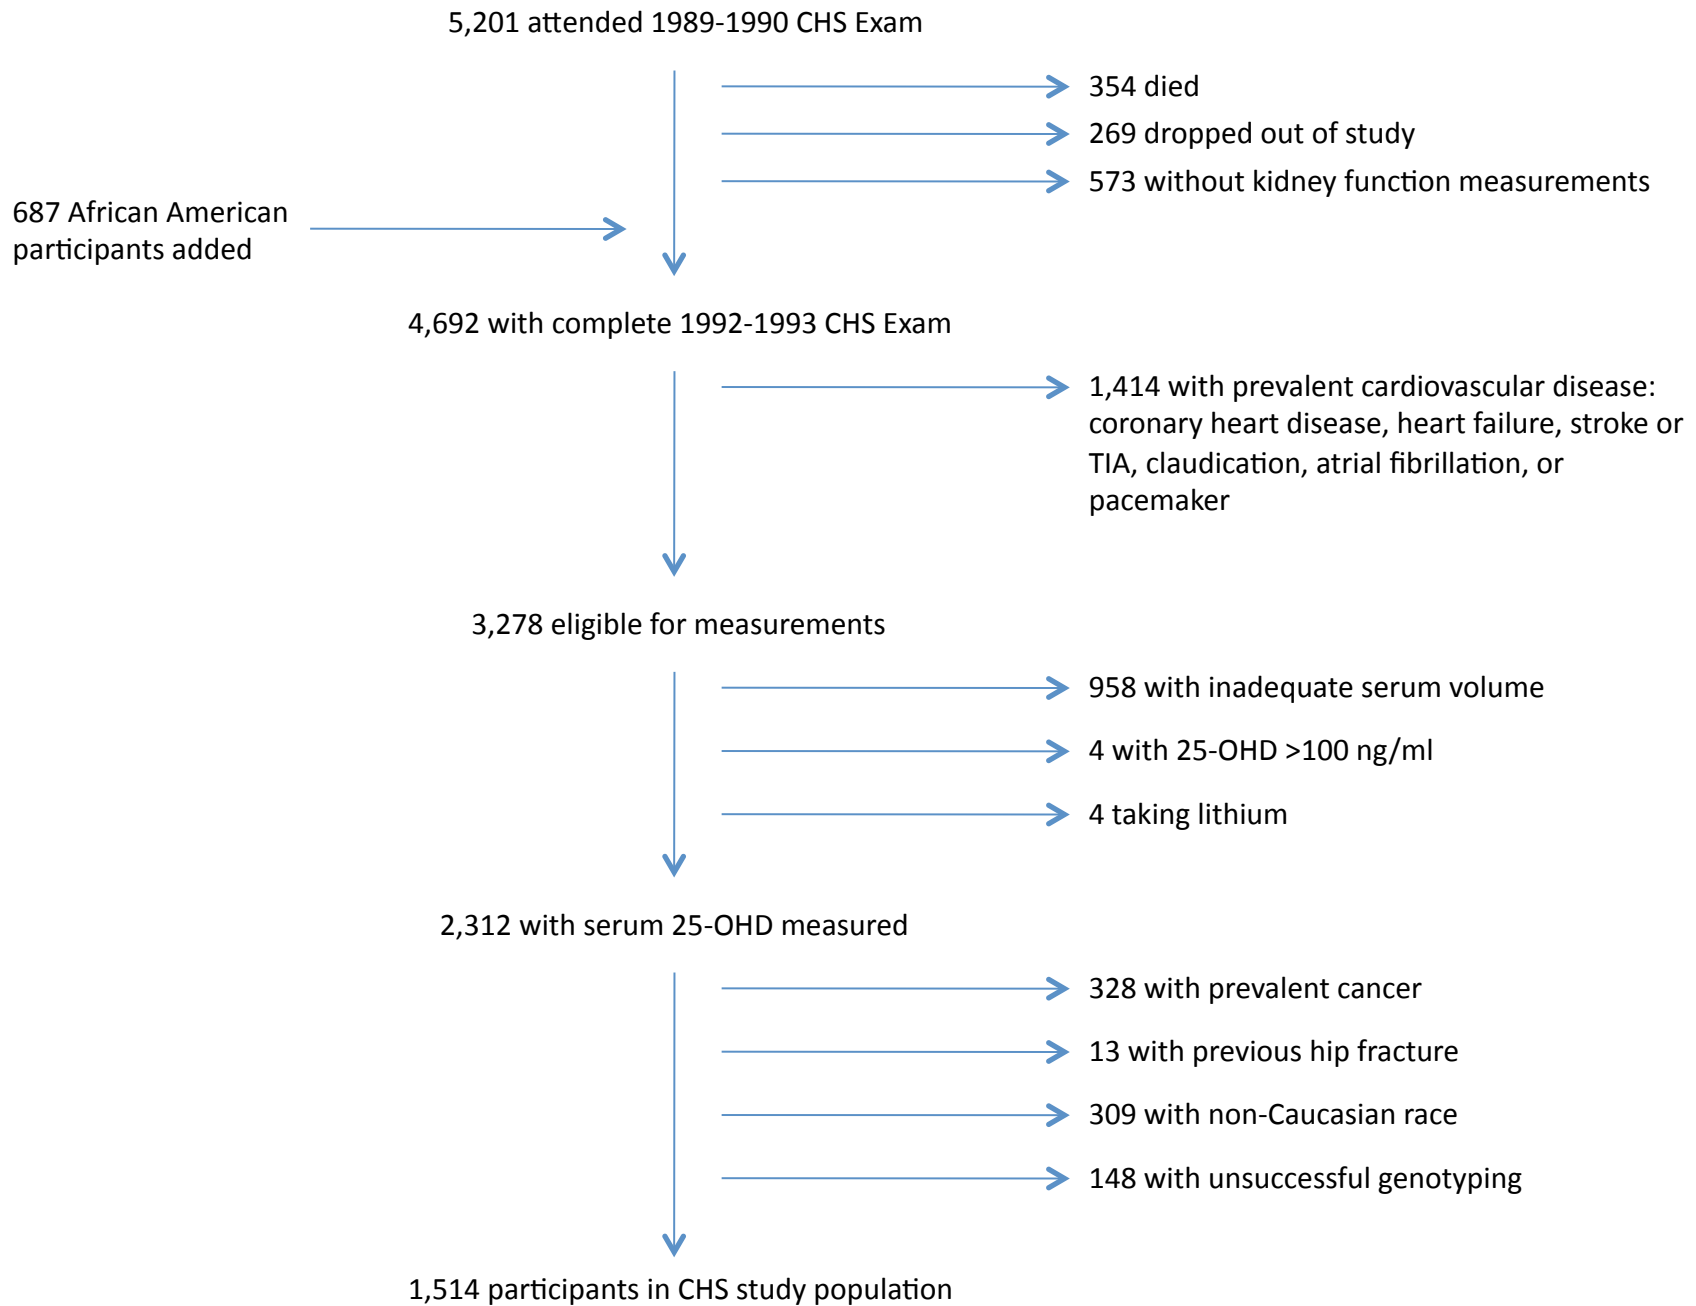

**eFigure 2.** Penalized spline describing the association between season-specific 25-hydroxyvitamin D Z score and risk of the composite outcome, adjusted for age and sex, in the Cardiovascular Health Study

Downloaded From: <http://jama.jamanetwork.com/> by a University of Washington Libraries User on 03/18/2013

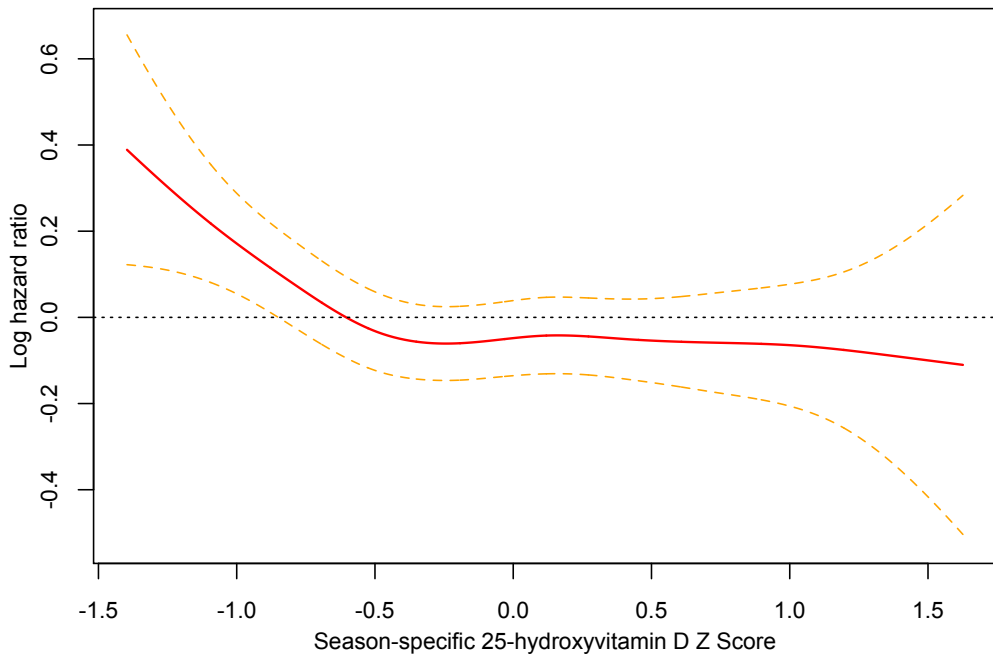

Winter

10

20

30

Summer

20

30

40

25-hydroxyvitamin D Concentration (ng/ml)



X-axes representing the corresponding 25(OH)D concentrations in the winter and summer seasons are also displayed. The spline was estimated using a proportional hazards model. The dashed lines represent pointwise 95% confidence intervals for the estimated log hazard ratios.

The dotted line indicates a log hazard ratio of 0 (hazard ratio of 1).

**Downloaded From: <http://jama.jamanetwork.com/> by a University of Washington Libraries User on 03/18/2013**

**eFigure 3.** Estimates of interaction between low vitamin D and the number of minor alleles on risk of the composite outcome, by study and overall, for the two VDR variants: rs7968585 and rs2239179

a) rs7968585

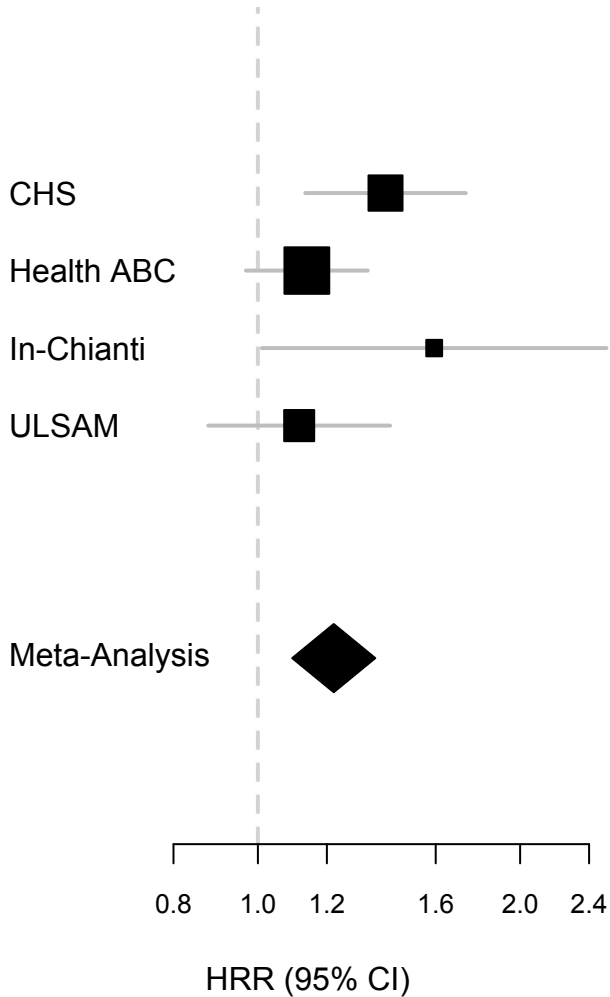

b) rs2239179

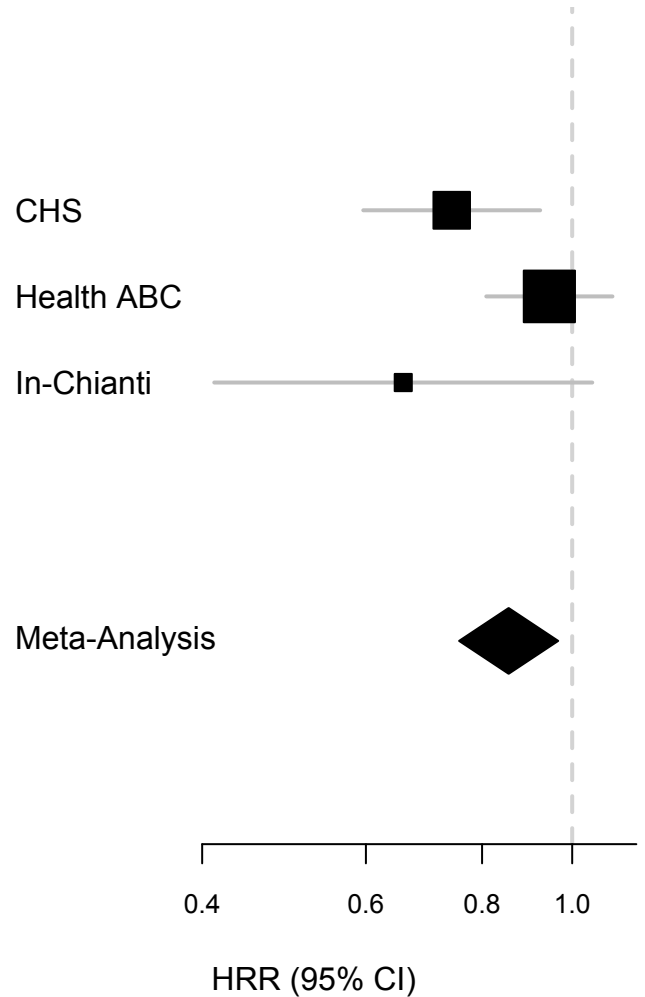

The diamond displays the meta-analysis hazard ratio (HRR). The size of the squares is inversely proportional to the estimated variance.

Downloaded From: <http://jama.jamanetwork.com/> by a University of Washington Libraries User on 03/18/2013

**eFigure 4.** Kaplan-Meier plots describing the association of low vitamin D with risk of the composite outcome in the Cardiovascular Health Study, stratified according to the number of copies of the minor allele for the 2 *VDR* variants: **rs7968585 and rs2239179**

## a) rs7968585

0 Minor Alleles

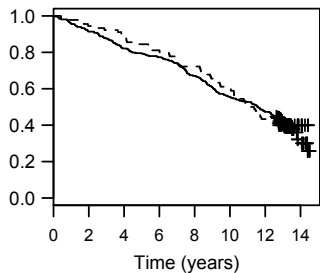

# At Risk

|        |     |     |     |     |
|--------|-----|-----|-----|-----|
| Normal | 313 | 257 | 210 | 148 |
| Low    | 90  | 79  | 65  | 39  |

1 Minor Allele

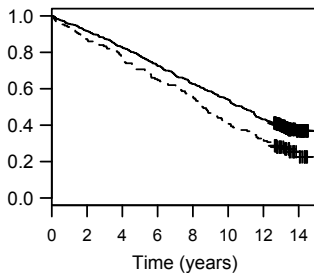

# At Risk

|        |     |     |     |     |
|--------|-----|-----|-----|-----|
| Normal | 609 | 504 | 381 | 263 |
| Low    | 150 | 113 | 84  | 48  |

2 Minor Alleles

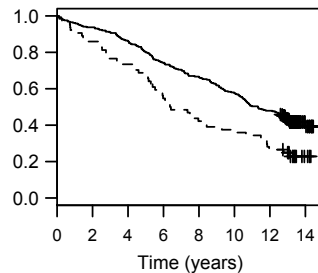

# At Risk

|        |     |     |     |     |
|--------|-----|-----|-----|-----|
| Normal | 288 | 248 | 192 | 138 |
| Low    | 64  | 47  | 27  | 17  |

## b) rs2239179

0 Minor Alleles

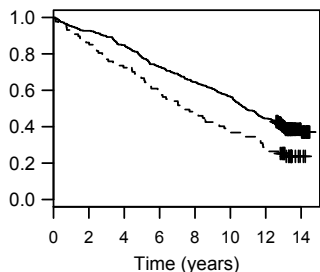

# At Risk

|        |     |     |     |     |
|--------|-----|-----|-----|-----|
| Normal | 409 | 347 | 264 | 182 |
| Low    | 87  | 63  | 41  | 23  |

1 Minor Allele

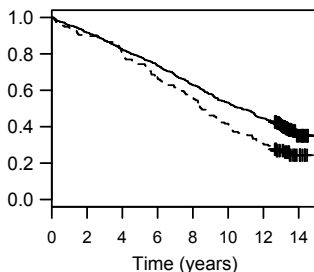

# At Risk

|        |     |     |     |     |
|--------|-----|-----|-----|-----|
| Normal | 595 | 490 | 374 | 265 |
| Low    | 156 | 124 | 88  | 48  |

2 Minor Alleles

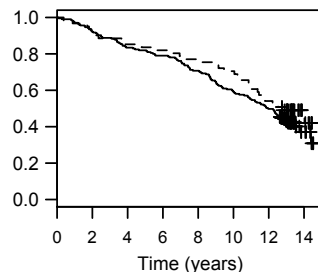

# At Risk

|        |     |     |     |     |
|--------|-----|-----|-----|-----|
| Normal | 205 | 171 | 145 | 102 |
| Low    | 61  | 52  | 47  | 33  |

Proportion of participants free of hip fracture, myocardial infarction, cancer, and death is presented on the y-axis. The numbers at risk at baseline, and at 4, 8, and 12 years of follow-up are given below each plot. Vertical lines indicate censoring. Normal/Low 25(OH)D defined by above/below the season-specific 20th percentile of 25(OH)D concentrations. Solid and dotted lines indicate participants with normal and low 25(OH)D levels respectively.

## eReferences

1. Fried LP, Borhani NO, Enright P, et al. The Cardiovascular Health Study: design and rationale. *Ann Epidemiol.* Feb 1991;1(3):263-276.
2. Shea MK, Houston DK, Tooze JA, et al. Correlates and prevalence of insufficient 25-hydroxyvitamin D status in black and white older adults: the health, aging and body composition study. *J Am Geriatr Soc.* Jul 2011;59(7):1165-1174.
3. Ferrucci L, Bandinelli S, Benvenuti E, et al. Subsystems contributing to the decline in ability to walk: bridging the gap between epidemiology and geriatric practice in the InCHIANTI study. *J Am Geriatr Soc.* Dec 2000;48(12):1618-1625.
4. Melhus H, Snellman G, Gedeberg R, et al. Plasma 25-hydroxyvitamin D levels and fracture risk in a community-based cohort of elderly men in Sweden. *J Clin Endocrinol Metab.* Jun;95(6):2637-2645.
